# Supplementary material
Source: MDPI journal article supplement (https://www.mdpi.com/2077-0472/13/6/1143)
Supplement: s1 [file s1]

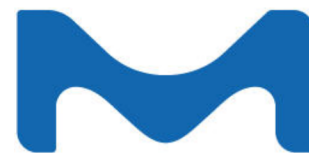

# Specification

---

8.20258.0050 5-Isopropyl-2-methylphenol for synthesis

---

| Specification           |               |         |
|-------------------------|---------------|---------|
| Assay (GC, area%)       | ≥ 97.0        | % (a/a) |
| Density (d 20 °C/ 4 °C) | 0.976 - 0.978 |         |
| Identity (IR)           | passes test   |         |

Dr. Oliver Schramel  
Responsible laboratory manager quality control

---

This document has been produced electronically and is valid without a signature.
