# Supplementary material
Source: MDPI journal article supplement (https://www.mdpi.com/2077-0472/13/6/1143)
Supplement: s1 [file s1]

# Certificate of analysis

Product No.: A14332  
Product: Eugenol, 99%  
Lot No.: 10187597

Appearance: Clear very pale yellow liquid  
Refractive index: 1.5411 @20°C  
Assay (GC): 99.7%  
Identification (FTIR): Conforms

This document has been electronically generated and does not require a signature.
