# Supplementary material
Source: MDPI journal article supplement (https://www.mdpi.com/2077-0472/13/6/1143)
Supplement: s1 [file s1]

# Certificate of analysis

Product No.: A14563  
Product: Thymol, 98+ %  
Lot No.: 10189419

|                |                           |
|----------------|---------------------------|
| Appearance     | White, crystalline powder |
| Melting point  | 49.0- 50.7 °C             |
| Assay (GC)     | 99.7 %                    |
| FT-IR Spectrum | Conforms to structure     |

This document has been electronically generated and does not require a signature.
