# Supplementary material
Source: MDPI journal article supplement (https://www.mdpi.com/2077-0472/13/6/1143)
Supplement: s1 [file s1]

# Certificate of analysis

Product No.: A13736  
Product: Geraniol, 97%  
Lot No.: 10181467

Appearance Clear colorless liquid  
Refractive index ( $n_D^{20}$ ) 1.4772  
Assay (GC) 99.1 %  
IR Spectrum Conforms to structure

This document has been electronically generated and does not require a signature.

Order our products online [www.alfa.com](http://www.alfa.com)

**ThermoFisher**  
S C I E N T I F I C
